# Supplementary material for: The paraspecific neutralisation of snake venom induced coagulopathy by antivenoms
Source: PubMed Central journal article supplement (PMC6123674; doi:10.1038/s42003-018-0039-1), 2018-04-19
Supplement: 42003_2018_39_MOESM1_ESM.pdf [file 42003_2018_39_MOESM1_ESM.pdf]

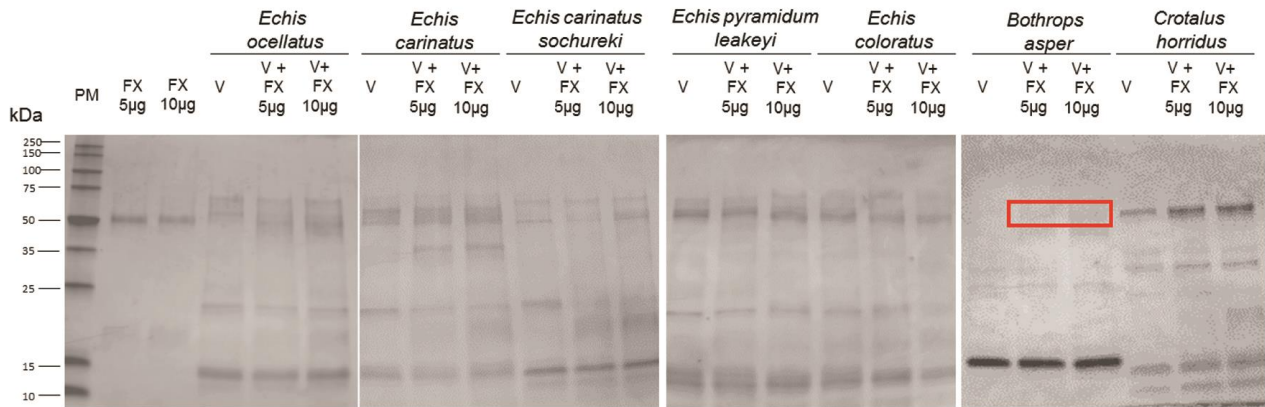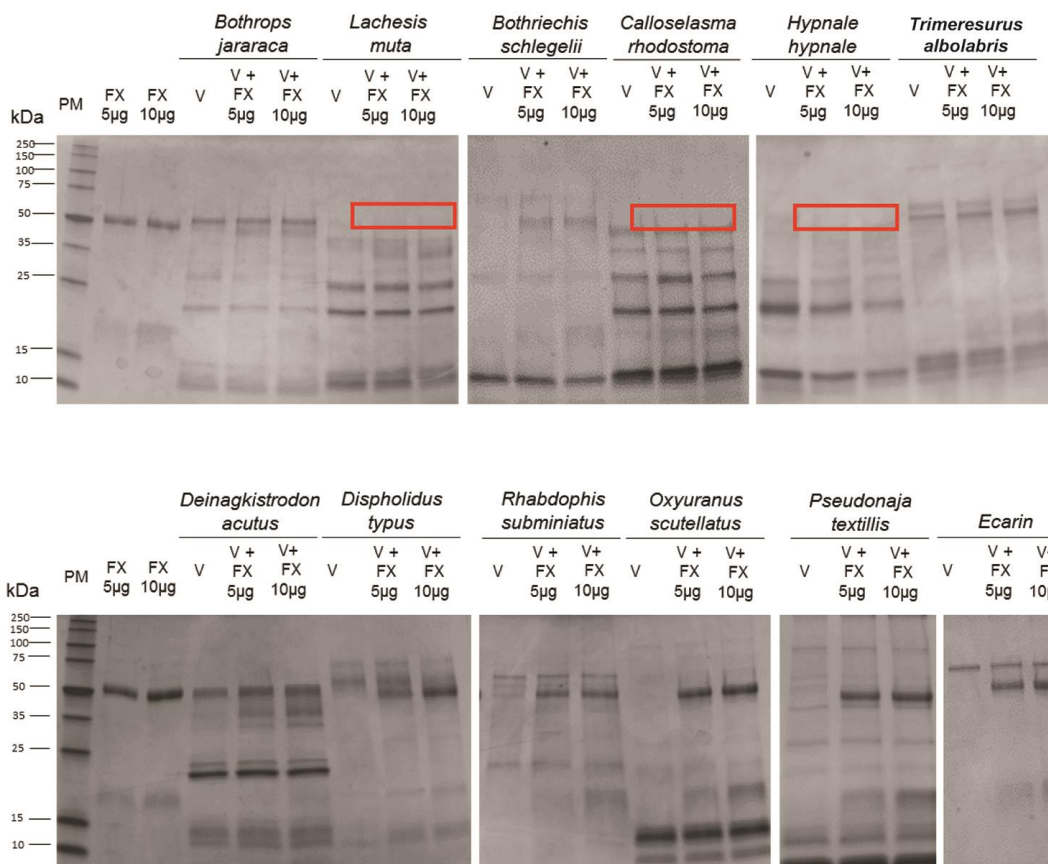

**Supplementary Figure 1.** The cleavage of Factor X by the 18 procoagulant snake venoms used in this study. Factor X (FX) was incubated with and without venom (V) at different concentrations (5 µg and 10 µg) and analysed by reduced gel electrophoresis. The Factor X control is displayed on the left of each row (for display purposes these controls and the protein marker have been spliced from the other gels in each row). Red boxes indicate definitive depletion of Factor X, indicative of cleavage.

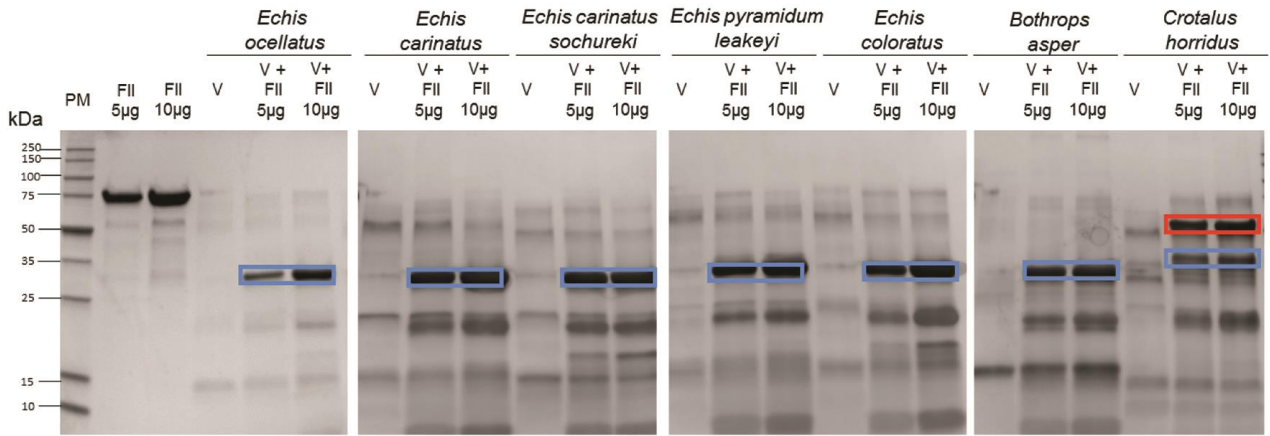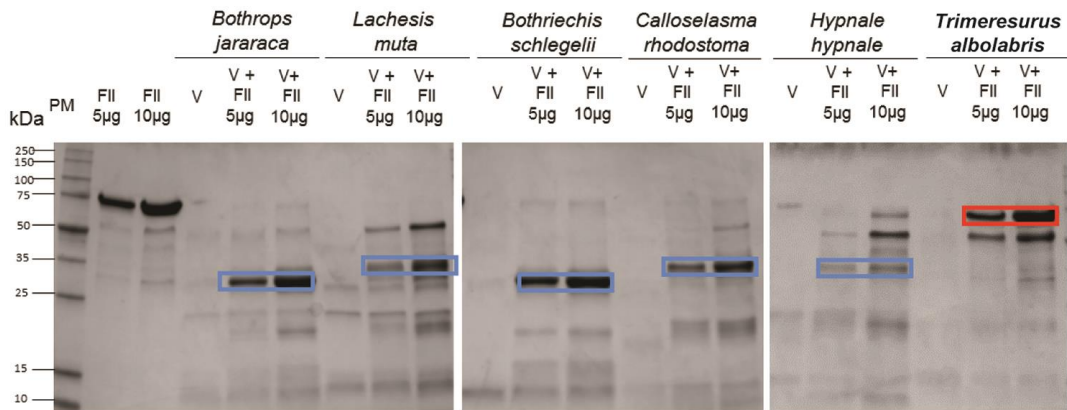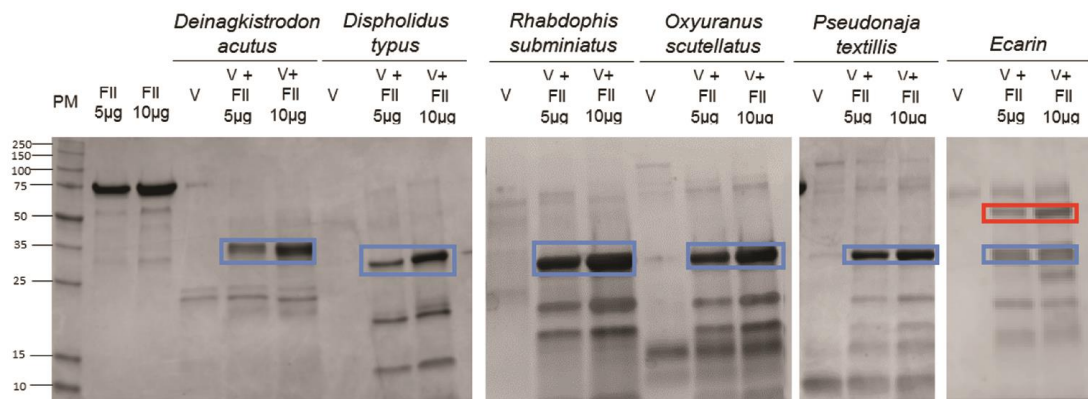

**Supplementary Figure 2.** The cleavage of prothrombin by the 18 procoagulant snake venoms used in this study. Prothrombin (FII) was incubated with and without venom (V) at different concentrations (5 µg and 10 µg) and analysed by reduced gel electrophoresis. The prothrombin control is displayed on the left of each row (for display purposes these controls and the protein marker have been spliced from the other gels in each row). Boxes indicate clearly defined cleavage products produced: red boxes correspond to meizothrombin (48 kDa) and blue boxes correspond to thrombin (36.7 kDa) or the β-chain of thrombin (31 kDa).

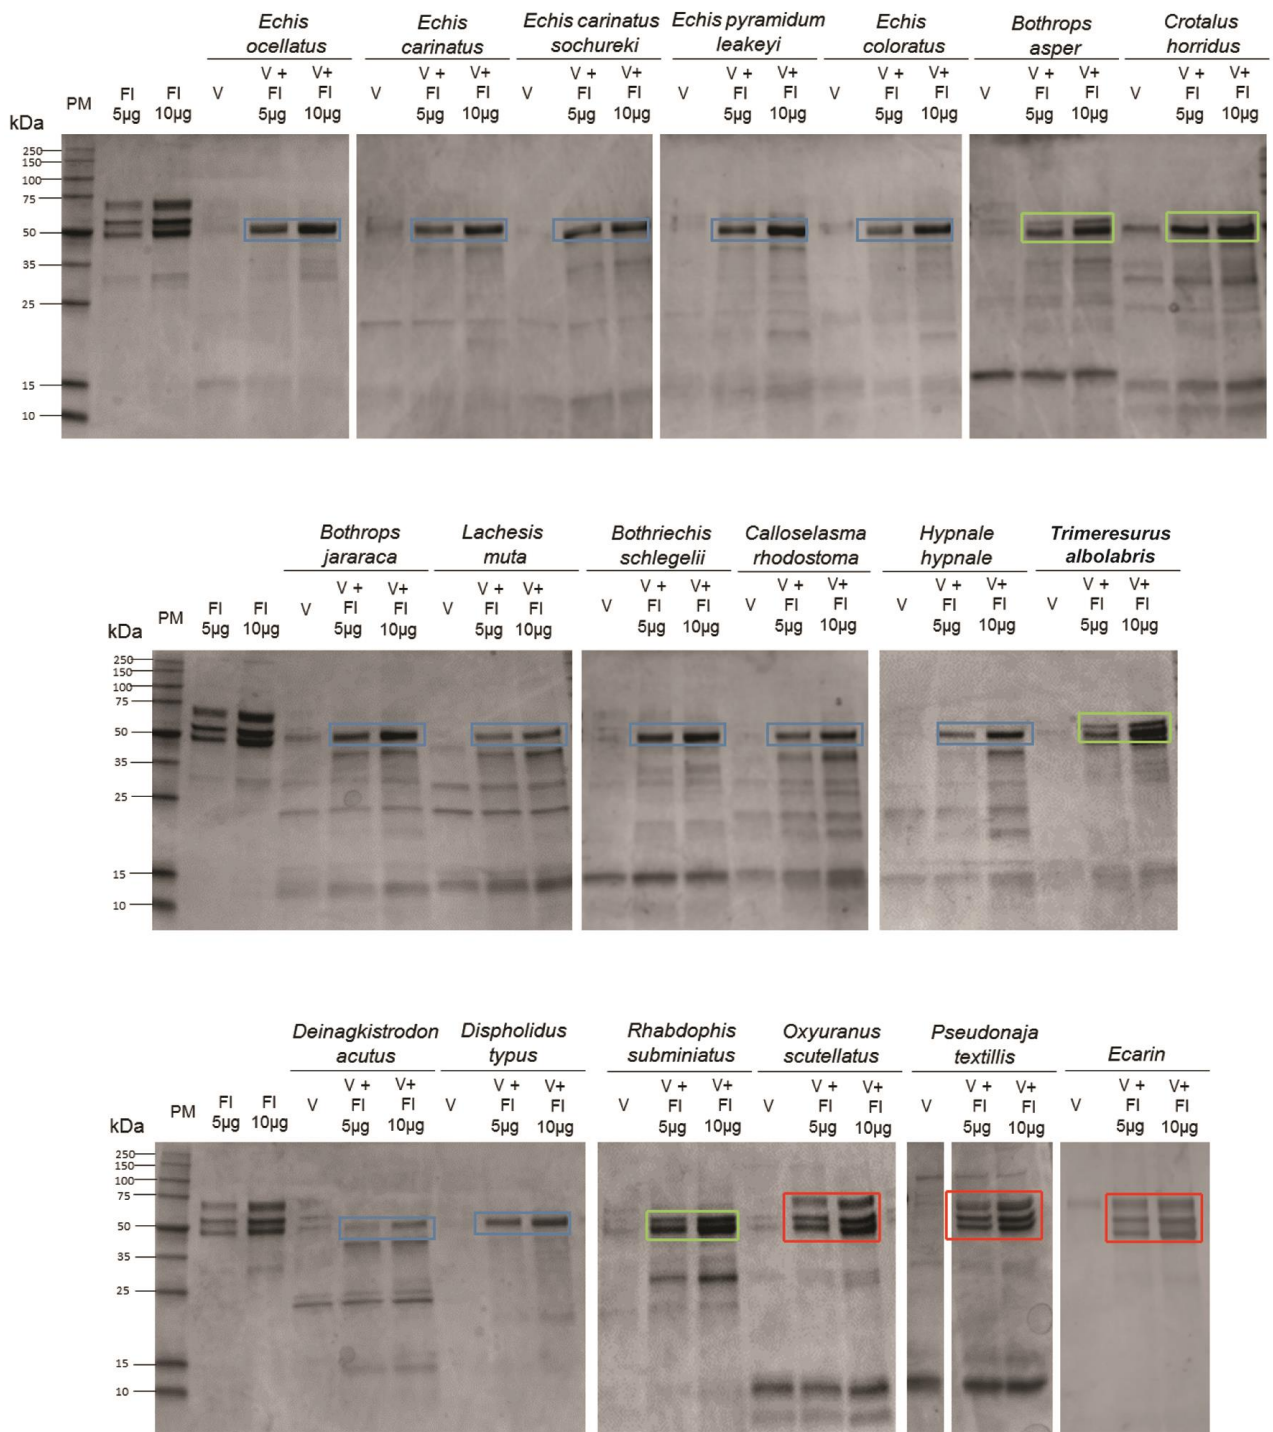

**Supplementary Figure 3.** The cleavage of fibrinogen by the 18 procoagulant snake venoms used in this study. Fibrinogen (FI) was incubated with and without venom (V) at different concentrations (5 µg and 10 µg) and analysed by reduced gel electrophoresis. The three chains of fibrinogen ( $\alpha$ -chain ~63.5 kDa;  $\beta$ -chain ~56 kDa;  $\gamma$ -chain ~47 kDa) are evident in the controls on the left hand side of each row (for display purposes these controls and the protein marker have been spliced from the other gels in each row). Red boxes indicate no apparent cleavage of fibrinogen, green boxes indicate cleavage of the  $\alpha$ -chain only and blue boxes indicate cleavage of both  $\alpha$ - and  $\beta$ -chains.

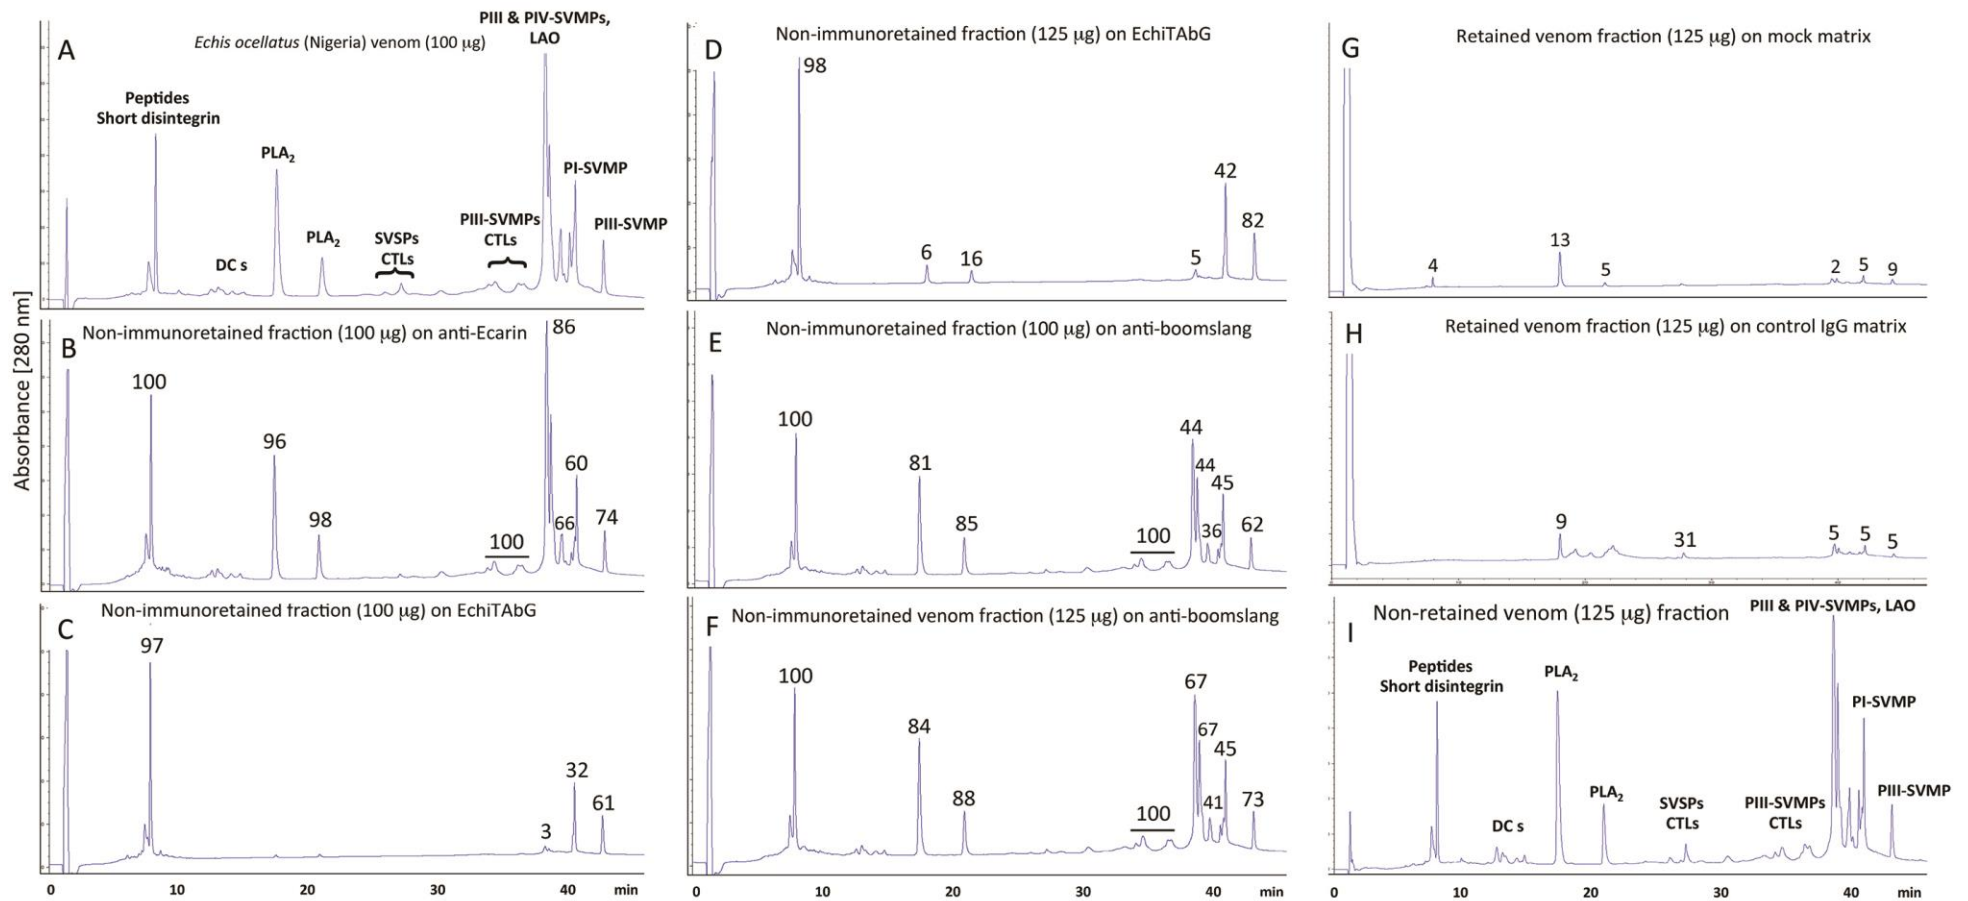

**Supplementary Figure 4.** Antivenomic analysis of bound (immunoretained) and unbound (non-immunoretained) toxins in the venom of the saw-scaled viper (*Echis ocellatus*) when exposed to species-appropriate (EchiTABG) and -inappropriate (anti-boomslang [SAIMR boomslang] and anti-eccaridin) antivenoms. Numbers above peaks represent the percentage of each major venom peak that remains following binding interactions. See also Figure 4.

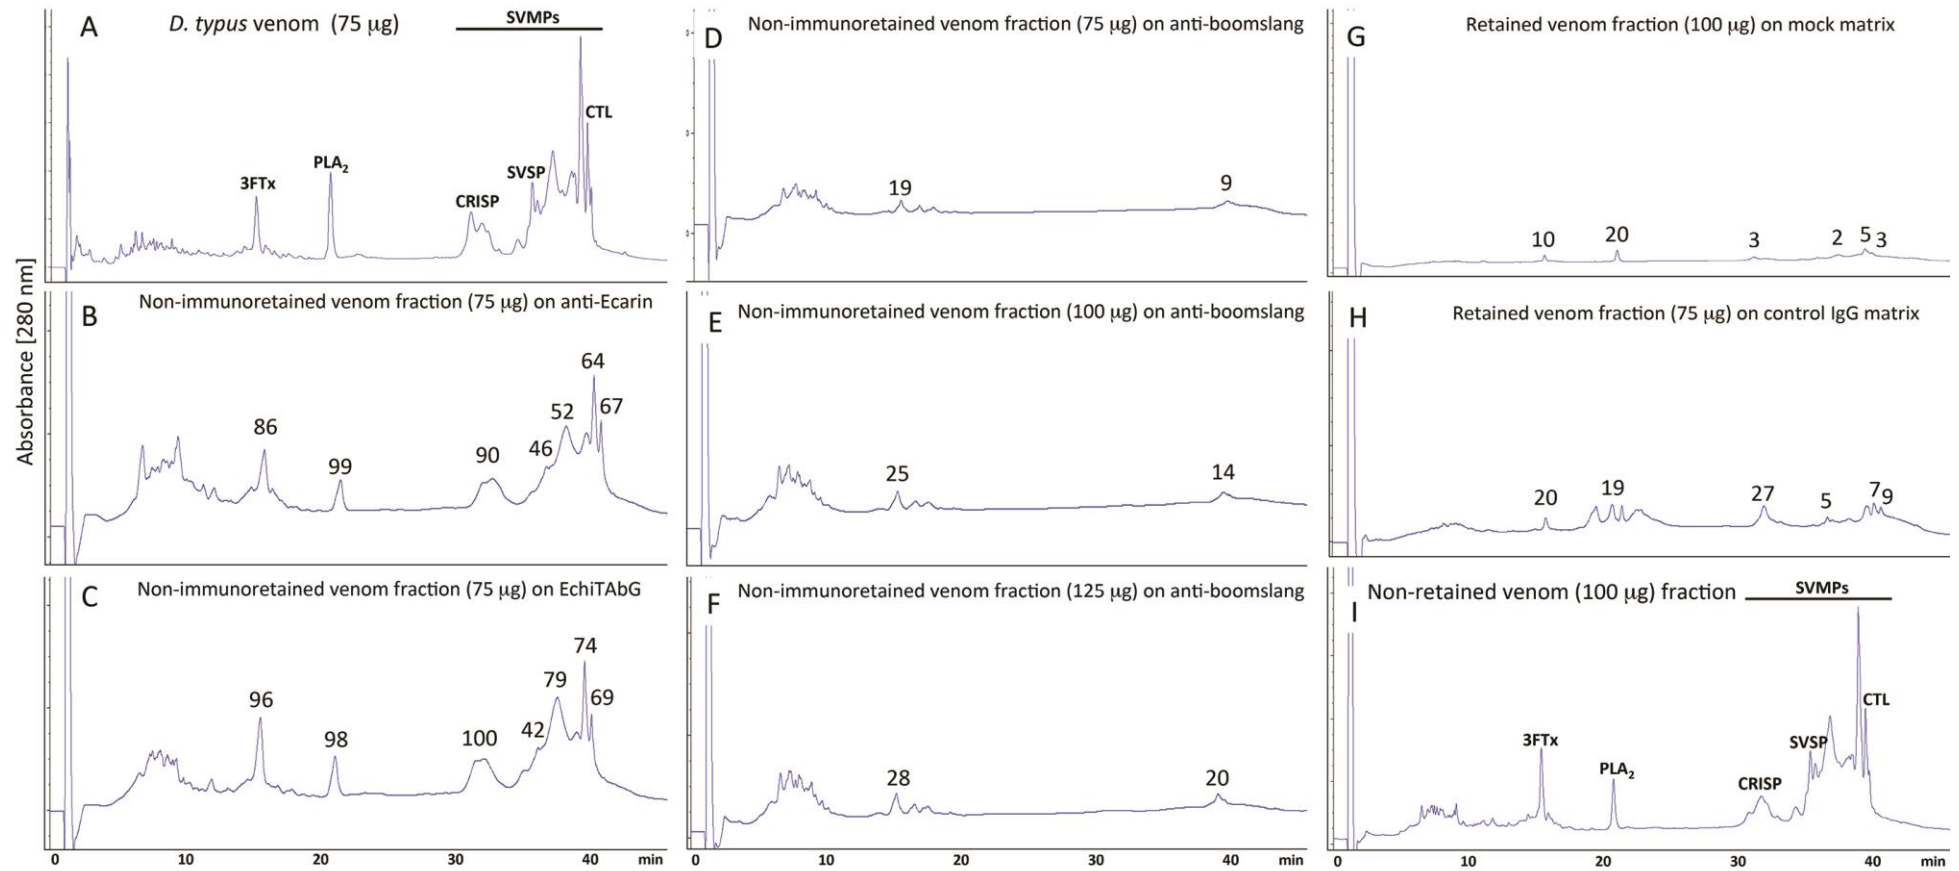

**Supplementary Figure 5.** Antivenomic analysis of bound (immunoretained) and unbound (non-immunoretained) toxins in the venom of the boomslang (*Dispholidus typus*) when exposed to species-appropriate (anti-boomslang [SAIMR boomslang]) and -inappropriate (EchiTABG and anti-ecarin) antivenoms. Numbers above peaks represent the percentage of each major venom peak that remains following binding interactions. See also Figure 4.

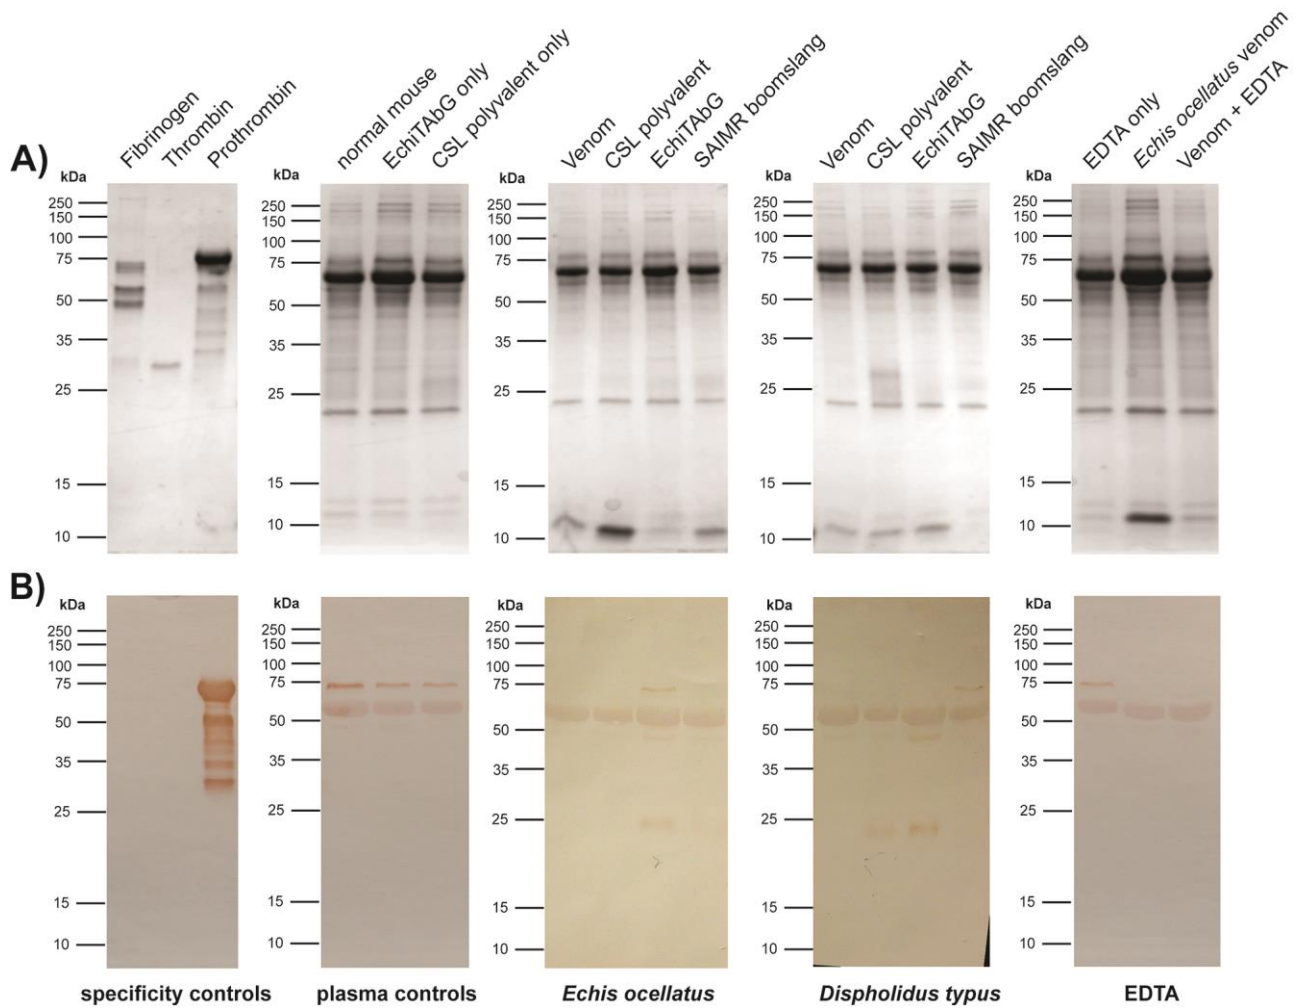

**Supplementary Figure 6.** Analysis of murine plasma obtained from the *in vivo* venom neutralisation study by SDS-PAGE gel electrophoresis and Western blotting. **A)** One dimensional SDS-PAGE analysis of pooled plasma (n=5) taken from each experimental group of mice challenged with venom and/or antivenoms/EDTA. **B)** Western blotting analysis of the same plasma with an anti-prothrombin antibody. Note that mice treated with anti-ecarin antibodies (raised in rabbits) were not included in this analysis as the anti-prothrombin antibody used was of rabbit origin and therefore the secondary, anti-rabbit antibody showed extensive cross-reactivity (i.e. loss of specificity).

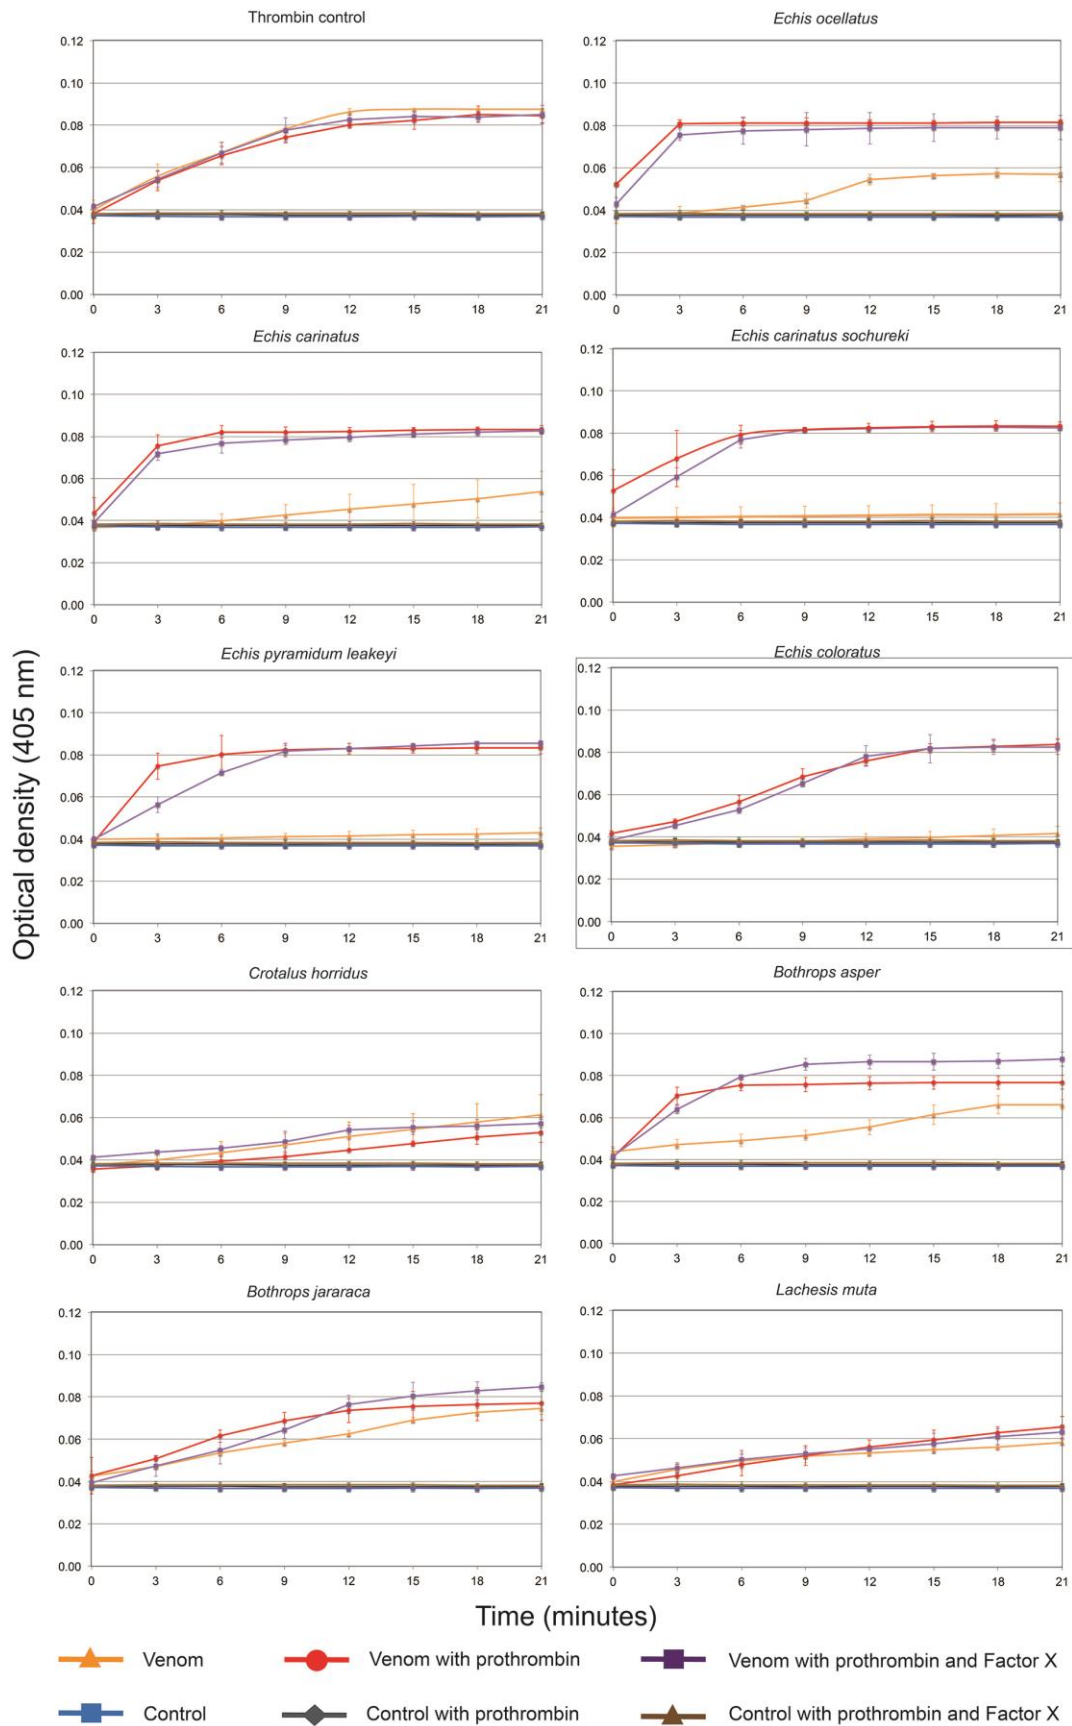

**Supplementary Figure 7.** Venom activity in the chromogenic assay in the presence of different clotting factors. Lines represent means of triplicate measurements and error bars represent SEMs. The lines displayed were used for the area under the curve analyses presented in Figure 2, following subtraction of appropriate control readings.

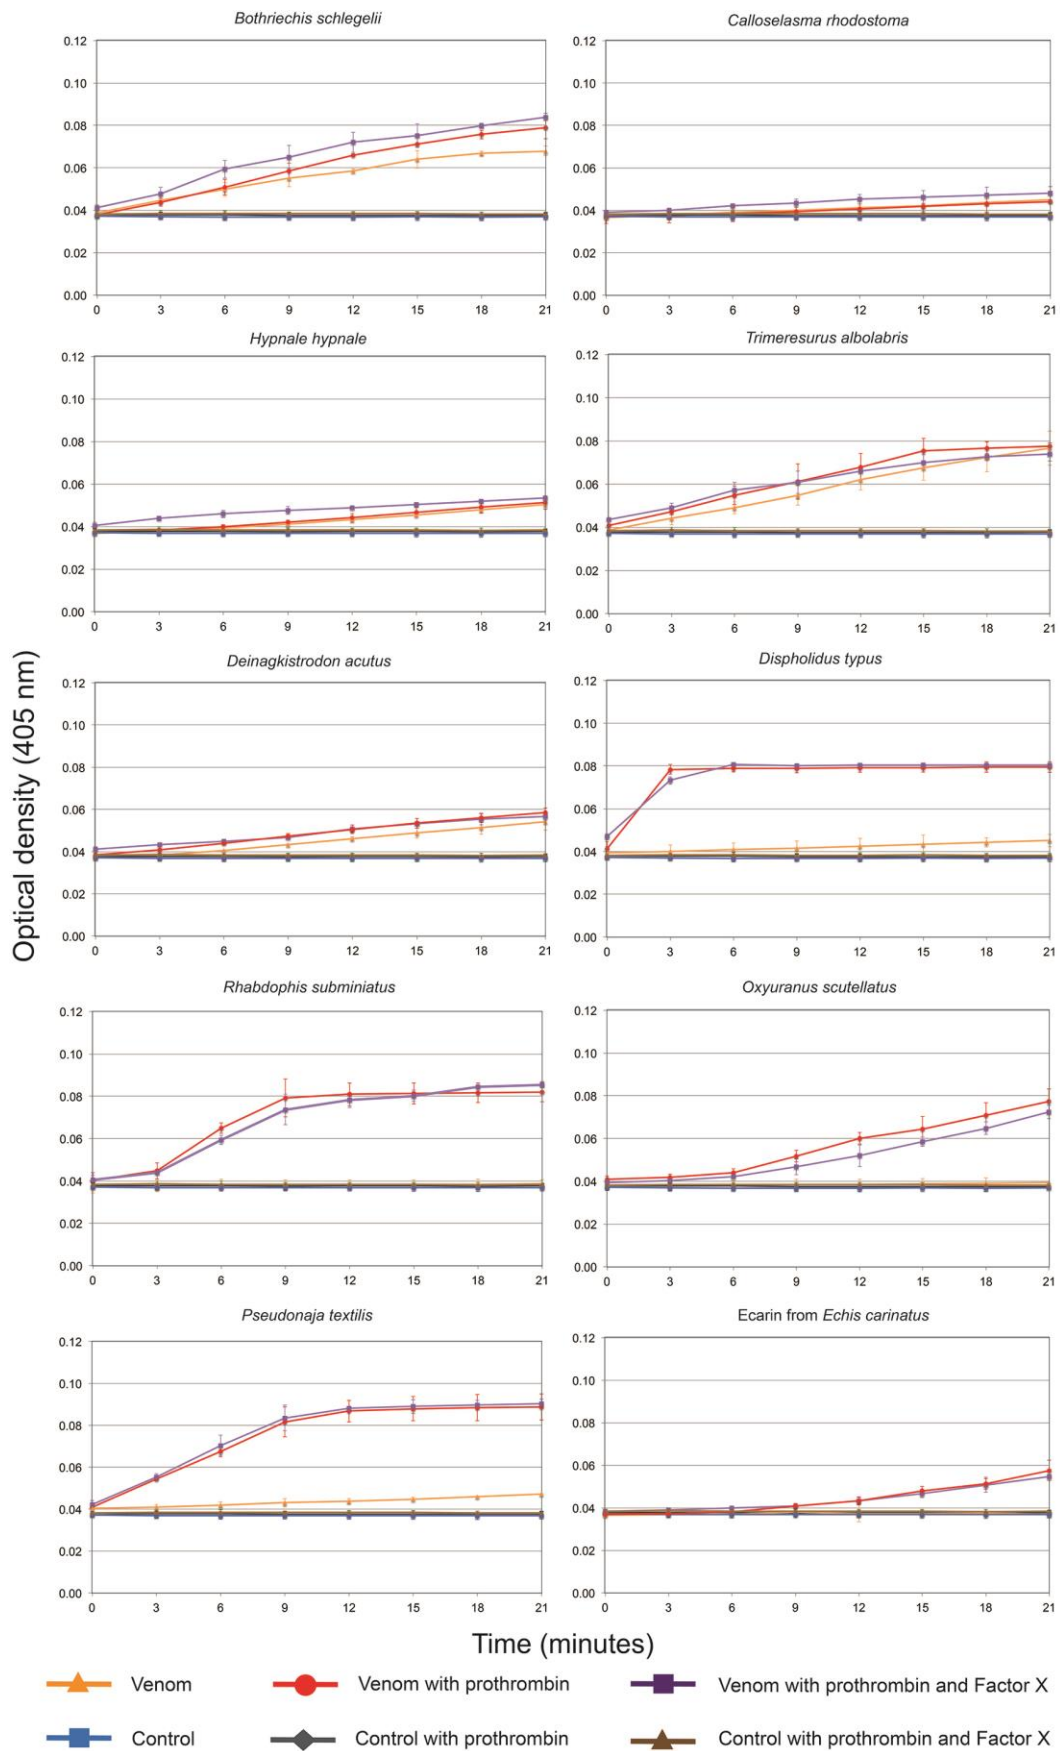

**Supplementary Figure 8.** Venom activity in the chromogenic assay in the presence of different clotting factors. Lines represent means of triplicate measurements and error bars represent SEMs. The lines displayed were used for the area under the curve analyses presented in Figure 2, following subtraction of appropriate control readings.



**Supplementary Table 1.** The species and localities of the snakes and the venoms used in this study.

| <b>Species</b>                   | <b>Family</b>             | <b>Origin</b>                    | <b>Continent</b> |
|----------------------------------|---------------------------|----------------------------------|------------------|
| <i>Bitis gabonica</i>            | Viperidae<br>(Viperinae)  | West Africa<br>(unknown locale)  | Africa           |
| <i>Bitis arietans</i>            | “                         | Nigeria                          | Africa           |
| <i>Bitis nasicornis</i>          | “                         | West Africa<br>(unknown locale)  | Africa           |
| <i>Echis ocellatus</i>           | “                         | Nigeria                          | Africa           |
| <i>Echis pyramidum leakeyi</i>   | “                         | Kenya                            | Africa           |
| <i>Echis coloratus</i>           | “                         | Egypt                            | Africa           |
| <i>Echis carinatus sochureki</i> | “                         | UAE                              | Asia             |
| <i>Echis carinatus</i>           | “                         | India                            | Asia             |
| <i>Cerastes cerastes</i>         | “                         | Egypt                            | Africa           |
| <i>Proatheris superciliaris</i>  | “                         | Tanzania                         | Africa           |
| <i>Atheris ceratophora</i>       | “                         | Tanzania                         | Africa           |
| <i>Causus maculatus</i>          | “                         | Nigeria                          | Africa           |
| <i>Causus rhombeatus</i>         | “                         | South Africa                     | Africa           |
| <i>Vipera ammodytes</i>          | “                         | unknown locale                   | Europe           |
| <i>Vipera aspis</i>              | “                         | France                           | Europe           |
|                                  |                           |                                  |                  |
| <i>Trimeresurus albolabris</i>   | Viperidae<br>(Crotalinae) | Thailand                         | Asia             |
| <i>Tropidolaemus wagleri</i>     | “                         | Thailand                         | Asia             |
| <i>Deinagkistrodon acutus</i>    | “                         | China                            | Asia             |
| <i>Calloselasma rhodostoma</i>   | “                         | captive bred<br>(unknown origin) | Asia             |
| <i>Hypnale hypnale</i>           | “                         | Sri Lanka                        | Asia             |
| <i>Crotalus horridus</i>         | “                         | USA                              | N. America       |
| <i>Crotalus viridis</i>          | “                         | USA                              | N. America       |
| <i>Sistrurus catenatus</i>       | “                         | USA                              | N. America       |
| <i>Agkistrodon bilineatus</i>    | “                         | Mexico                           | N. America       |
| <i>Bothriechis schlegelii</i>    | “                         | Costa Rica                       | N. America       |
| <i>Bothrops asper</i>            | “                         | Costa Rica                       | N. America       |
| <i>Bothrops jararaca</i>         | “                         | Brazil                           | S. America       |
| <i>Lachesis muta</i>             | “                         | Brazil                           | S. America       |
|                                  |                           |                                  |                  |
| <i>Aspidelaps lubricus</i>       | Elapidae                  | captive bred<br>(unknown origin) | Africa           |
| <i>Dendroaspis angusticeps</i>   | “                         | Tanzania                         | Africa           |
| <i>Dendroaspis viridis</i>       | “                         | West Africa<br>(unknown locale)  | Africa           |
| <i>Dendroaspis polylepis</i>     | “                         | captive bred<br>(unknown origin) | Africa           |
| <i>Naja multifasciata</i>        | “                         | Cameroon                         | Africa           |
| <i>Naja nubiae</i>               | “                         | unknown locale                   | Africa           |
| <i>Naja nigricollis</i>          | “                         | Togo                             | Africa           |
| <i>Naja haje</i>                 | “                         | Morocco                          | Africa           |
| <i>Naja annulifera</i>           | “                         | unknown locale                   | Africa           |
| <i>Naja mossambica</i>           | “                         | unknown locale                   | Africa           |

|                                |            |                                  |             |
|--------------------------------|------------|----------------------------------|-------------|
| <i>Naja melanoleuca</i>        | “          | Malawi                           | Africa      |
| <i>Naja nivea</i>              | “          | South Africa                     | Africa      |
| <i>Naja pallida</i>            | “          | captive bred<br>(unknown origin) | Africa      |
| <i>Naja atra</i>               | “          | China                            | Asia        |
| <i>Naja kaouthia</i>           | “          | Thailand                         | Asia        |
| <i>Ophiophagus hannah</i>      | “          | Thailand                         | Asia        |
| <i>Bungarus caeruleus</i>      | “          | Sri Lanka                        | Asia        |
| <i>Enhydrina schistosa</i>     | “          | Malaysia                         | Asia        |
| <i>Hydrophis cyanocinctus</i>  | “          | Malaysia                         | Asia        |
| <i>Micrurus nigrocinctus</i>   | “          | Costa Rica                       | N. America  |
| <i>Pseudechis australis</i>    | “          | Australia                        | Australasia |
| <i>Pseudonaja textilis</i>     | “          | Australia                        | Australasia |
| <i>Oxyuranus scutellatus</i>   | “          | Papua New<br>Guinea              | Australasia |
| <i>Acanthophis antarcticus</i> | “          | Papua New<br>Guinea              | Australasia |
| <i>Micropechis ikaheka</i>     | “          | Papua New<br>Guinea              | Australasia |
| <i>Laticauda colubrina</i>     | “          | Papua New<br>Guinea              | Australasia |
|                                |            |                                  |             |
| <i>Boiga irregularis</i>       | Colubrinae | Papua New<br>Guinea              | Australasia |
| <i>Dispholidus typus</i>       | “          | South Africa                     | Africa      |
|                                |            |                                  |             |
| <i>Rhabdophis subminiatus</i>  | Natricinae | Hong Kong                        | Asia        |

**Supplementary Table 2.** The procoagulant potency of various snake venoms to normal citrated human plasma and their capability to clot plasma deficient in Factor X or prothrombin.

| Species                          | MCD-P dose in normal plasma ( $\mu\text{g} \pm \text{SD}$ ) | Clotting of factor-deficient plasma |                |               |                |
|----------------------------------|-------------------------------------------------------------|-------------------------------------|----------------|---------------|----------------|
|                                  |                                                             | Factor X                            |                | Prothrombin   |                |
|                                  |                                                             | 1x MCD-P dose                       | 10x MCD-P dose | 1x MCD-P dose | 10x MCD-P dose |
| <i>Echis ocellatus</i>           | 0.09 ( $\pm 0.01$ )                                         | ✓                                   | ✓              | ✗             | ✗              |
| <i>Echis carinatus</i>           | 0.49 ( $\pm 0.02$ )                                         | ✓                                   | ✓              | ✗             | ✗              |
| <i>Echis carinatus sochureki</i> | 0.35 ( $\pm 0.02$ )                                         | ✓                                   | ✓              | ✗             | ✗              |
| <i>Echis pyramidum leakeyi</i>   | 0.44 ( $\pm 0.03$ )                                         | ✓                                   | ✓              | ✗             | ✗              |
| <i>Echis coloratus</i>           | 17.50 ( $\pm 1.36$ )                                        | ✓                                   | ✓              | ✗             | ✗              |
| <i>Crotalus horridus</i>         | 8.53 ( $\pm 0.87$ )                                         | ✓                                   | ✓              | ✓             | ✓              |
| <i>Bothrops asper</i>            | 0.07 ( $\pm 0.01$ )                                         | ✓                                   | ✓              | ✓             | ✓*             |
| <i>Bothrops jararaca</i>         | 4.40 ( $\pm 0.54$ )                                         | ✓                                   | ✓              | ✓             | ✓              |
| <i>Lachesis muta</i>             | 2.29 ( $\pm 0.31$ )                                         | ✓                                   | ✓              | ✓             | ✓              |
| <i>Bothriechis schlegelii</i>    | 2.07 ( $\pm 0.22$ )                                         | ✓                                   | ✓              | ✓             | ✓*             |
| <i>Calloselasma rhodostoma</i>   | 1.12 ( $\pm 0.09$ )                                         | ✓                                   | ✓              | ✓             | ✓              |
| <i>Hypnale hypnale</i>           | 7.18 ( $\pm 0.91$ )                                         | ✓                                   | ✓              | ✓             | ✓              |
| <i>Trimeresurus albolabris</i>   | 7.66 ( $\pm 0.99$ )                                         | ✓                                   | ✓              | ✓             | ✓              |
| <i>Deinagkistrodon acutus</i>    | 2.54 ( $\pm 0.40$ )                                         | ✓                                   | ✓              | ✓             | ✓              |
| <i>Dispholidus typus</i>         | 0.03 ( $\pm 0.01$ )                                         | ✓                                   | ✓              | ✗             | ✗              |
| <i>Rhabdophis subminiatus</i>    | 2.38 ( $\pm 0.19$ )                                         | ✓                                   | ✓              | ✗             | ✗              |
| <i>Oxyuranus scutellatus</i>     | 0.34 ( $\pm 0.02$ )                                         | ✓                                   | ✓              | ✗             | ✗              |
| <i>Pseudonaja textilis</i>       | 0.03 ( $\pm 0.01$ )                                         | ✓                                   | ✓              | ✗             | ✗              |

MCD-P dose refers to the dose of venom required to clot 200  $\mu\text{l}$  of normal human citrated plasma in 60 seconds without the addition of cofactors.  $\pm\text{SD}$  indicates standard deviation of triplicate results. Green ticks indicate that the venom clotted Factor X- or prothrombin-deficient human citrated plasma at 1 or 10 times the MCD-P dose in 60 seconds, except where asterisks are displayed, which indicate that clotting was delayed and occurred between one and five minutes (*B. asper*: 154 seconds; *B. schlegelii*: 86 seconds). Red crosses indicate that the venom failed to clot the plasma after five minutes.

**Supplementary Table 3.** The procoagulant potency of various snake venoms to human plasma and their neutralisation by different antivenoms.

| Species                          | MCD-P (µg) | Neutralising MCD dose (µl antivenom) |                 |                |             |
|----------------------------------|------------|--------------------------------------|-----------------|----------------|-------------|
|                                  |            | EchiTABG                             | SAIMR boomslang | CSL polyvalent | anti-ecarin |
| <i>Echis ocellatus</i>           | 0.09       | ✓ 10                                 | ✓ 10            | ✗ NE           | ✓ 30        |
| <i>Echis carinatus</i>           | 0.49       | ✓ 10                                 | ✓ 30            | ✗ NE           | ✓ 10        |
| <i>Echis carinatus sochureki</i> | 0.35       | ✓ 10                                 | ✓ 10            | ✗ NE           | ✓ 10        |
| <i>Echis pyramidum leakeyi</i>   | 0.44       | ✓ 10                                 | ✓ 10            | ✗ NE           | ✓ 10        |
| <i>Echis coloratus</i>           | 17.50      | ✓ 10                                 | ✓ 10            | ✗ NE           | ✗ NE        |
| <i>Crotalus horridus</i>         | 8.53       | ✓ 10                                 | ✓ 30            | ✗ NE           | ✗ NE        |
| <i>Bothrops asper</i>            | 0.07       | ✓ 10                                 | ✓ 30            | ✗ NE           | ✗ NE        |
| <i>Bothrops jararaca</i>         | 4.40       | ✓ 10                                 | ✓ 30            | ✗ NE           | ✗ NE        |
| <i>Lachesis muta</i>             | 2.29       | ✓ 30                                 | ✗ NE            | ✗ NE           | ✗ NE        |
| <i>Bothriechis schlegelii</i>    | 2.07       | ✓ 30                                 | ✓ 30            | ✗ NE           | ✗ NE        |
| <i>Calloselasma rhodostoma</i>   | 1.12       | ✗ NE                                 | ✗ NE            | ✗ NE           | ✗ NE        |
| <i>Hypnale hypnale</i>           | 7.18       | ✗ NE                                 | ✗ NE            | ✗ NE           | ✗ NE        |
| <i>Trimeresurus albolabris</i>   | 7.66       | ✓ 30                                 | ✓ 30            | ✗ NE           | ✗ NE        |
| <i>Deinagkistrodon acutus</i>    | 2.54       | ✓ □ □ 30                             | ✗ NE            | ✗ NE           | ✗ NE        |
| <i>Dispholidus typus</i>         | 0.03       | ✓ 1                                  | ✓ 0.1           | ✗ NE           | ✓ 1         |
| <i>Rhabdophis subminiatus</i>    | 2.38       | ✓ 10                                 | ✓ 30            | ✗ NE           | ✗ NE        |
| <i>Oxyuranus scutellatus</i>     | 0.34       | ✗ NE                                 | ✗ NE            | ✓ 0.1          | ✗ NE        |
| <i>Pseudonaja textilis</i>       | 0.03       | ✗ NE                                 | ✗ NE            | ✓ 0.1          | ✗ NE        |

MCD-P dose refers to the dose of venom required to clot 200 µl plasma in 60 seconds (see Supplementary Table 2). Green ticks indicate that the antivenom prevented clot formation in the MCD-P assay at the dose displayed. Red crosses and NE indicate not effective. Doses tested for all antibodies were 0.1, 1, 10 and 30 µl. EchiTABG – monospecific anti-*Echis ocellatus* antivenom (25 mg/ml); SAIMR boomslang – monospecific anti-*Dispholidus typus* antivenom (75 mg/ml); CSL polyvalent – polyspecific anti-Australian elapid (including *Oxyuranus scutellatus* and *Pseudonaja textilis*) antivenom (87.5 mg/ml); anti-ecarin – antibodies generated by immunisation with the *Echis*-specific SVMP prothrombin activator ecarin (25 mg/ml). Homologous combinations, i.e. *Echis ocellatus* vs *Echis ocellatus* antivenom, are highlighted by yellow shading. Control antibodies (IgG [25 mg/ml] purified from normal horse, sheep and rabbit serum) failed to prevent clotting by any venom at the highest dose tested (30 µl).
